# Supplementary material
Source: publisher figshare collection journal article supplement (https://tandf.figshare.com/ndownloader/files/13721366)
Supplement: Supplementary file 1 [file 13721366]

## Structural elements of the southern Thomson Orogen (Australian Tasmanides): a tale of megafolds

M. P. Doublier<sup>a</sup>, D. Purdy<sup>b</sup>, R. Hegarty<sup>c</sup>, M. Nicoll<sup>a</sup>, and H. Zwingmann<sup>d</sup>

<sup>a</sup> Geoscience Australia, GPO Box 378, Canberra, ACT 2601, Australia; <sup>b</sup> Geological Survey of Queensland, QLD Department of Natural Resources, Mines and Energy, PO Box 15261, Brisbane City East, QLD 4002, Australia; <sup>c</sup> Geological Survey of New South Wales, NSW Department of Planning and Environment, PO Box 344 Hunter Region MC, NSW 2310, Australia; <sup>d</sup> Division of Earth and Planetary Sciences, Graduate School of Science, Kyoto University, Sakyo, Kyoto, 606-8502, Japan

\*E-mail: michael.doublier@ga.gov.au

### SUPPLEMENTARY PAPERS

*Australian Journal of Earth Sciences* (2018) 65 (7+8),  
<https://doi.org/10.1080/08120099.2018.1526213>

---

Copies of Supplementary Papers may be obtained from the Geological Society of Australia's website ([www.gsa.org.au](http://www.gsa.org.au)), the Australian Journal of Earth Sciences website ([www.ajes.com.au](http://www.ajes.com.au)) or from the National Library of Australia's Pandora archive (<http://nla.gov.au/nla.arc-25194>).

---

### Supplementary papers

Figure S1. Major faults and shear zones of the southern Thomson Orogen on a semitransparent tilt derivative magnetic image (in colour), draped over a greyscale 1VD RTP magnetic intensity image; see Figure 1 for position.

Figure S2. Structural interpretation of the Mungallala Fault area showing sinistral dragging of magnetic features into the structure on a greyscale 1VD RTP magnetic intensity image (white corresponds to high magnetic intensity); see Figure 1 for position.



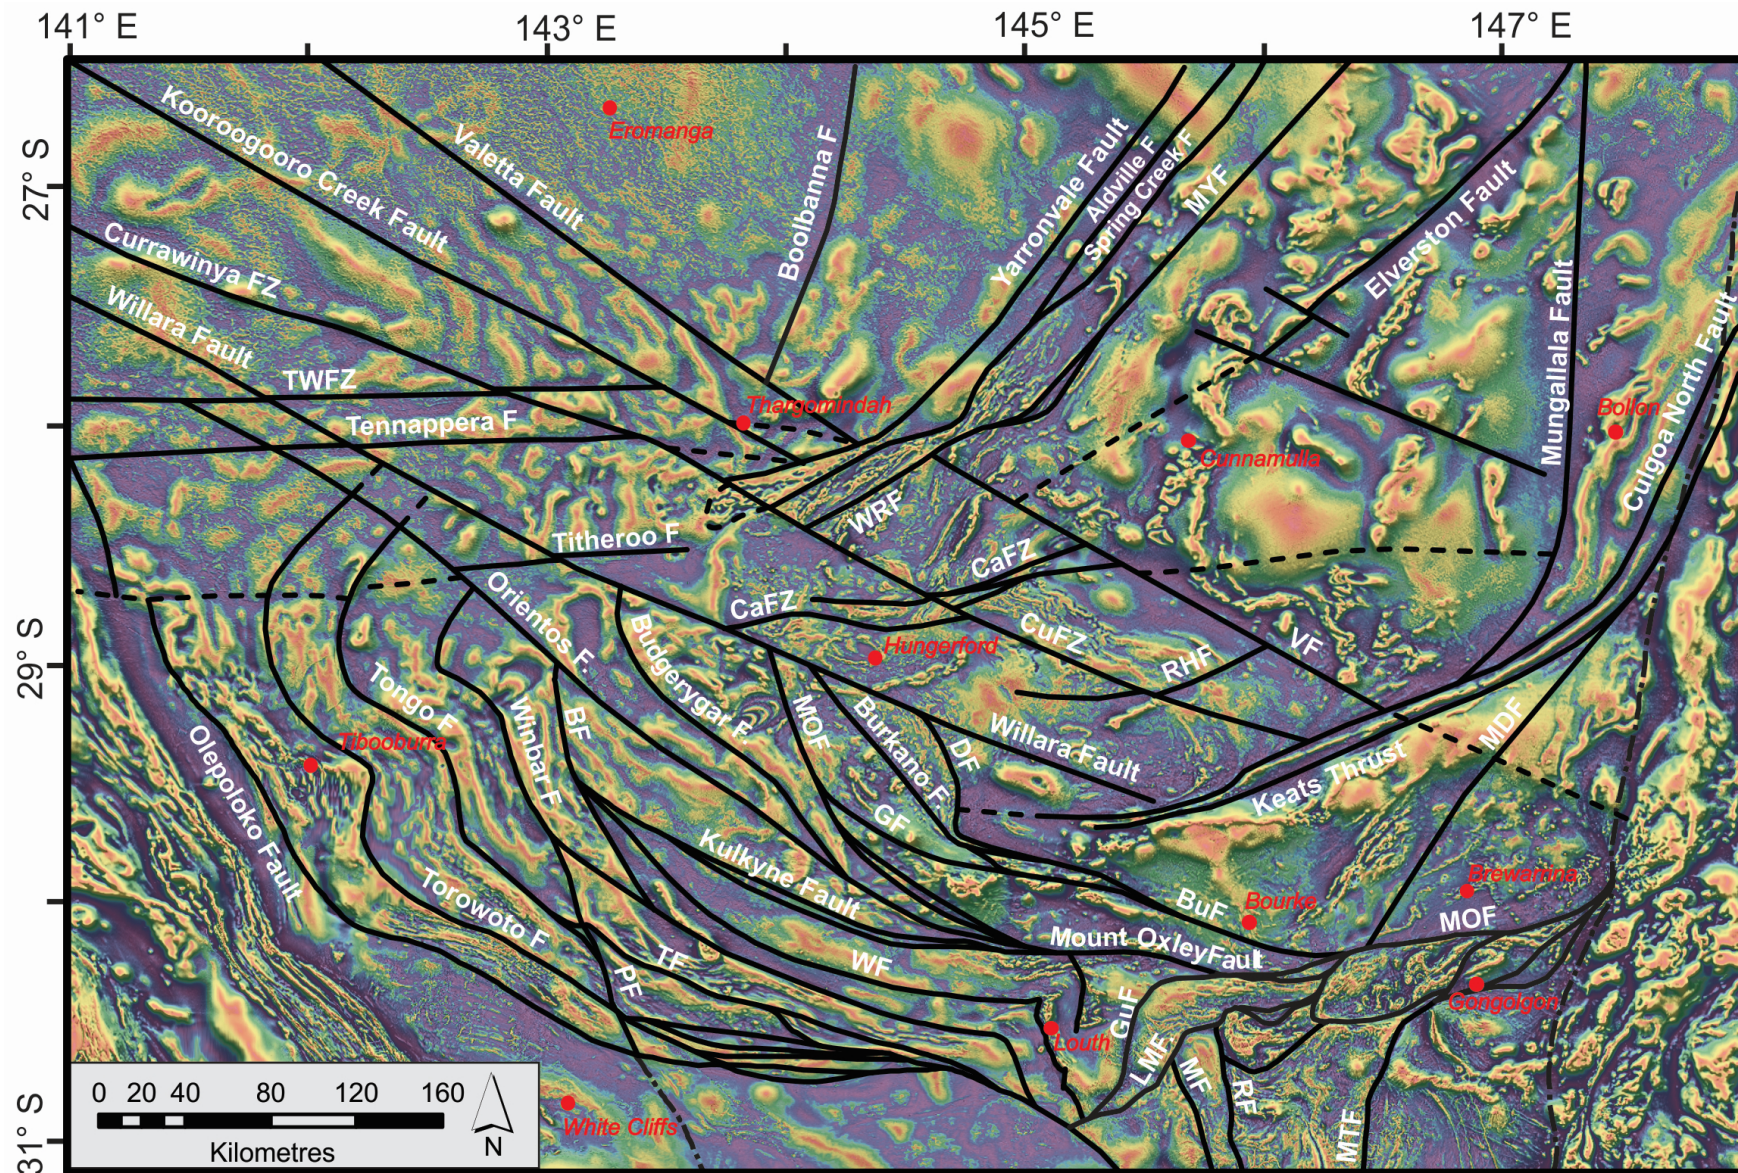

Figure S1. Major faults and shear zones of the southern Thomson Orogen on a semi-transparent tilt derivative magnetic image (in colour), draped over a greyscale 1VD RTP magnetic intensity image; see Figure 1 for position.



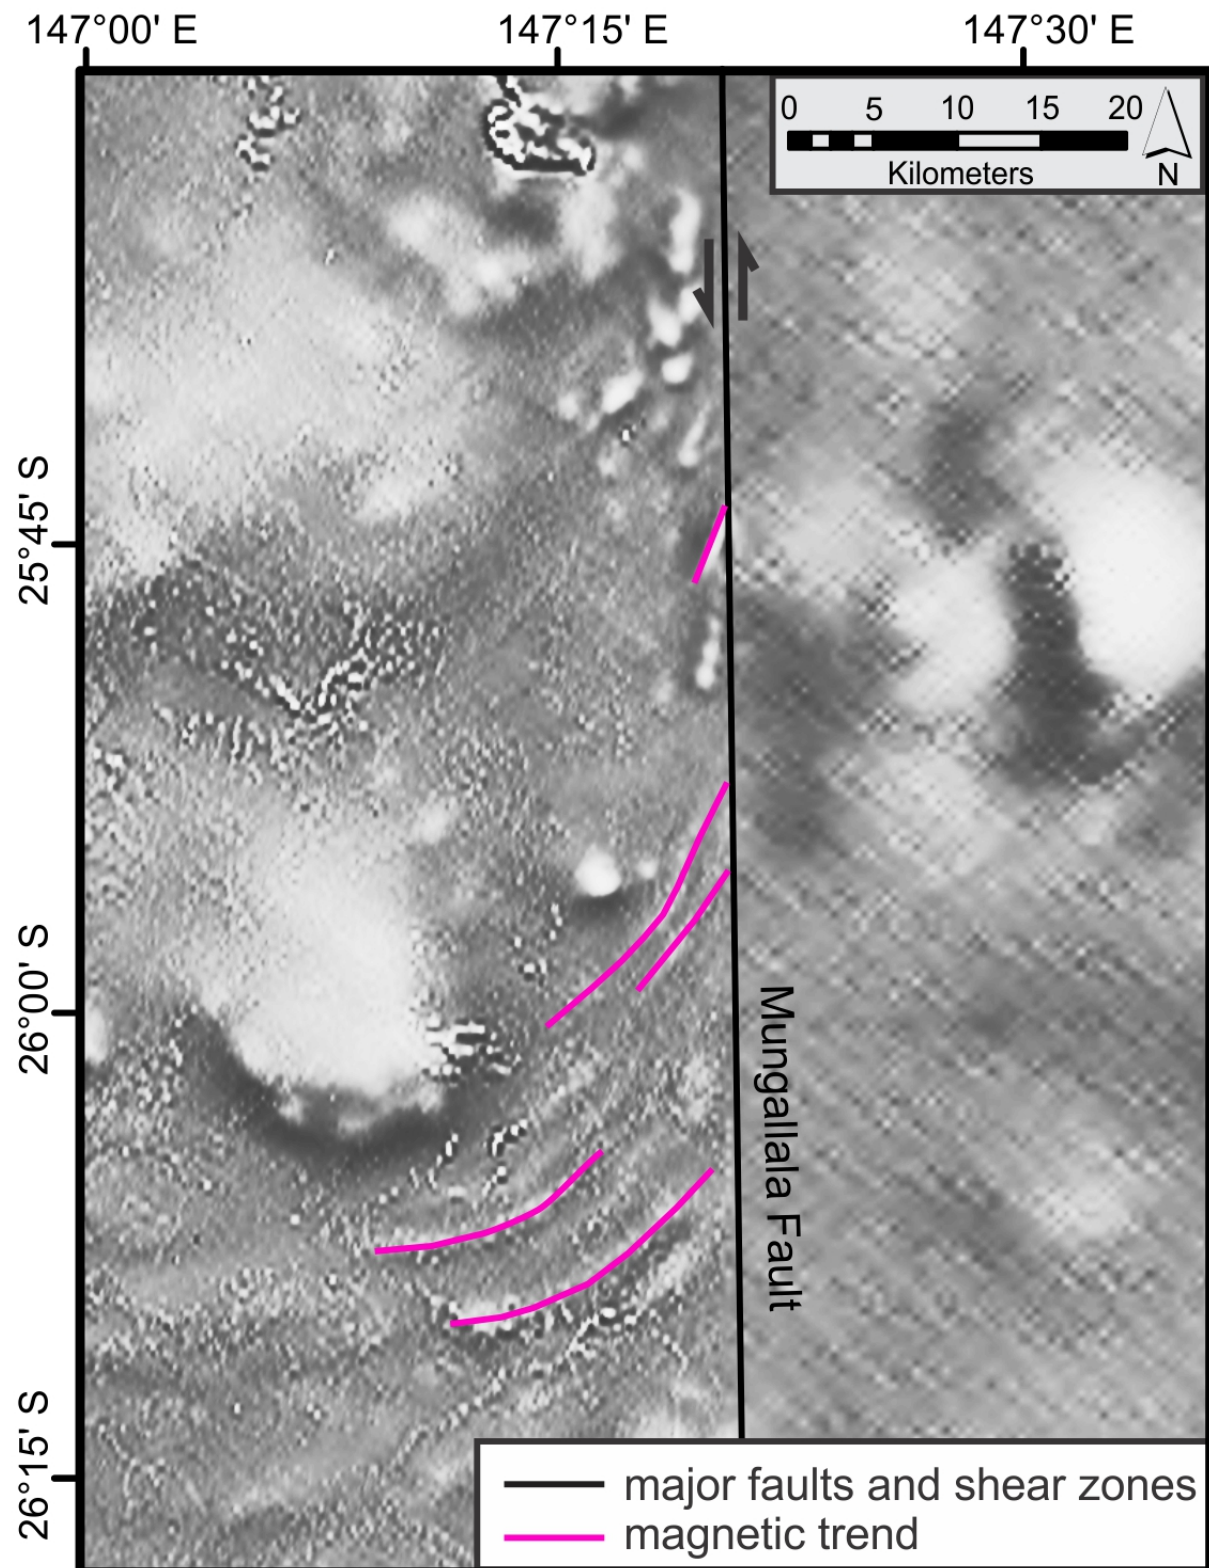

Figure S2. Structural interpretation of the Mungallala Fault area showing sinistral dragging of magnetic features into the structure on a greyscale 1VD RTP magnetic intensity image (white corresponds to high magnetic intensity); see Figure 1 for position.
